# Supplementary material for: About the Influence of Doping Approach on the Alkali Metal Catalyzed Slow Pyrolysis of Xylan
Source: Hindawi journal article supplement (doi:10.1155/2019/9392571), 2019-09-29
Supplement: f1 [file 9392571.f1.docx]

# Journal of Chemistry

# Supplementary Materials

# About the Influence of Doping Approach on the Alkali Metal Catalyzed Slow Pyrolysis of Xylan

Valentina Gargiulo*, Paola Giudicianni, Michela Alfè, Raffaele Ragucci

Institute for Research on Combustion (IRC-CNR), P.le V. Tecchio 80, 80125 Naples, Italy.

Correspondence should be addressed to Valentina Gargiulo; [gargiulo@irc.cnr.it](mailto:gargiulo@irc.cnr.it)

**Table S1.** Inorganics composition of raw (X) and demineralized (DX) xylans (adapted from Giudicianni et al. [23])

|  | **X** | **DX** |
| --- | --- | --- |
| **Total ashes (wt.%)** | 4.4 | 0.6 |
| **Na (mg/Kg)** | 21510 | 1243 |
| **K (mg/Kg)** | 150 | 0 |
| **Ca (mg/Kg)** | 4909 | 257 |
| **Ba (mg/Kg)** | 47 | 1 |
| **Mg (mg/Kg)** | 30 | 19 |
| **Fe (mg/Kg)** | 830 | 6 |

**Figure S1.** TG and DTG profiles of X, DX and DX_Kwet(x) samples (X and DX profiles adapted from Giudicianni et al. [25]).


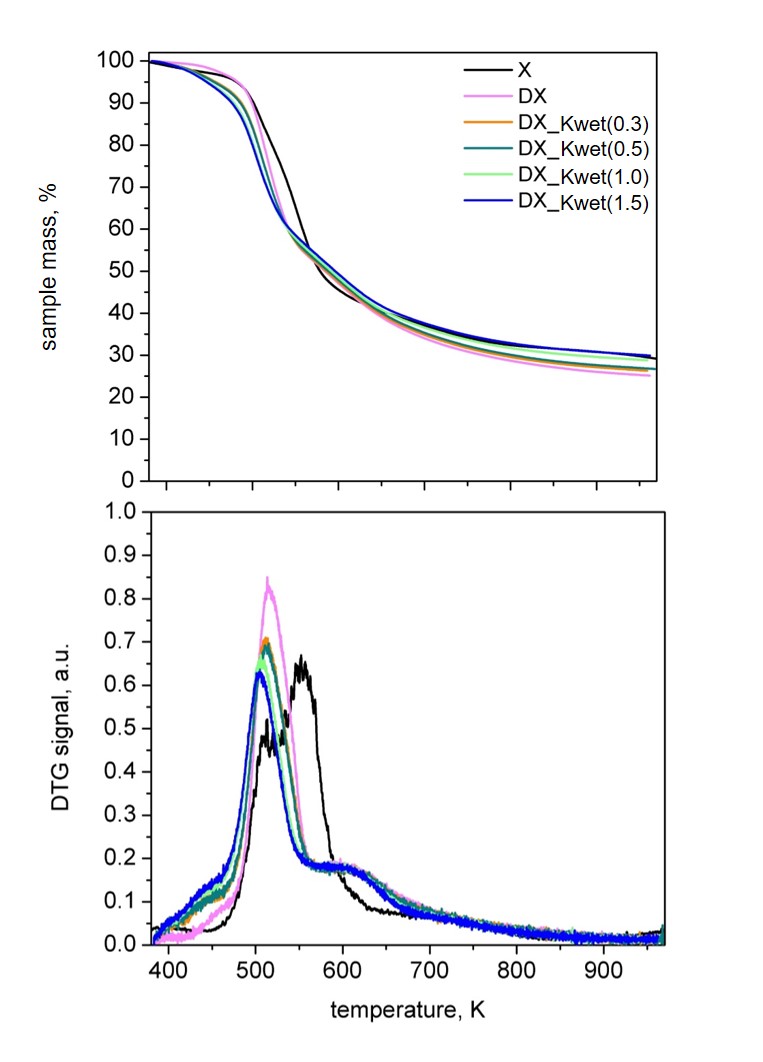


**Figure S2.** Gas releasing profiles during pyrolysis tests of X, DX and DX_Kwet(x) samples (X and DX profiles adapted from Giudicianni et al. [25]).


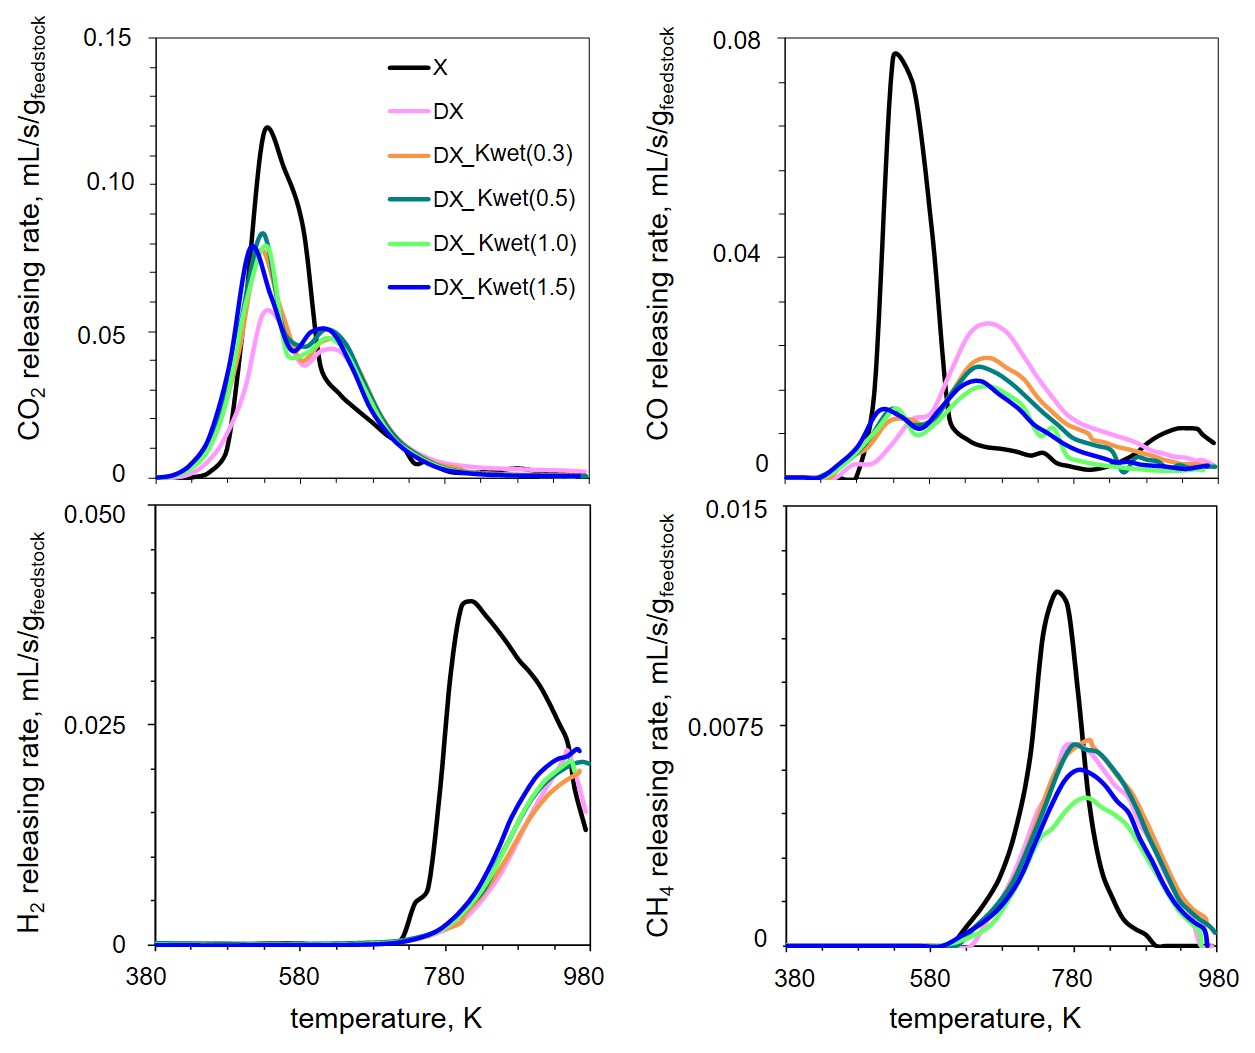


**Table S2.** Gas yields obtained from the pyrolysis of DX and DX_Kwet(x) samples.

|  | **CO**  **wt. %** | **CO2**  **wt. %** | **H2**  **wt. %** | **CH4**  **wt. %** | **C2H4**  **wt. %** | **C2H6**  **wt. %** |
| --- | --- | --- | --- | --- | --- | --- |
| **DX** | 5.68 | 13.89 | 0.32 | 0.79 | 0.062 | 0.10 |
| **DX_Kwet(0.3)** | 4.69 | 14.71 | 0.31 | 0.84 | 0.061 | 0.12 |
| **DX_Kwet(0.5)** | 4.17 | 14.88 | 0.36 | 0.80 | 0.060 | 0.13 |
| **DX_Kwet(1.0)** | 3.41 | 14.51 | 0.34 | 0.63 | 0.052 | 0.12 |
| **DX_Kwet(1.5)** | 3.58 | 14.53 | 0.35 | 0.67 | 0.052 | 0.11 |

**Table S3.** Gas yields obtained from the pyrolysis of X, DX, DX_Kwet(1.0) and DX_Kresin(1.2)

(X, DX and DX_Kresin(1.2) from Gargiulo et al. [24]).

|  | **CO**  **wt. %** | **CO2**  **wt. %** | **H2**  **wt. %** | **CH4**  **wt. %** | **C2H4**  **wt. %** | **C2H6**  **wt. %** |
| --- | --- | --- | --- | --- | --- | --- |
| **DX** | 5.68 | 13.89 | 0.32 | 0.79 | 0.062 | 0.10 |
| **DX_Kwet(1.0)** | 3.41 | 14.51 | 0.34 | 0.63 | 0.052 | 0.12 |
| **DX_Kresin(1.2)** | 4.73 | 22.01 | 0.54 | 1.07 | 0.082 | 0.36 |
| **X** | 7.08 | 17.88 | 0.70 | 0.68 | 0.093 | 0.26 |
